# Supplementary material for: The rs2682826 Polymorphism of the NOS1 Gene Is Associated with the Degree of Disability of Erectile Dysfunction
Source: MDPI journal article supplement (doi:10.3390/life13051082), 2023-04-25
Supplement: s1 [file s1]

Supplementary Table S1: Genotypes distribution of rs41279104 and rs2682826 polymorphisms of *NOS1* and association with Erectile Dysfunction.

| <b>Polymorphism</b> | <b>Control<br/>(n=114)</b> | <b>Erectile<br/>Dysfunction<br/>(n=119)</b> | <b>P</b> | <b>OR (95% CI)</b>  |
|---------------------|----------------------------|---------------------------------------------|----------|---------------------|
| <hr/> rs41279104    |                            |                                             |          |                     |
| CC                  | 91 (0.80)                  | 91 (0.77)                                   | –        | 1.00 (Reference)    |
| CT + TT             | 23 (0.20)                  | 28 (0.23)                                   | 0.536    | 1.22 (0.65 to 2.27) |
| Alleles             |                            |                                             |          |                     |
| C                   | 204 (0.89)                 | 206 (0.87)                                  | –        | 1.00 (Reference)    |
| T                   | 24 (0.11)                  | 32 (0.13)                                   | 0.333    | 1.32 (0.75 to 2.32) |
| <hr/> rs2682826     |                            |                                             |          |                     |
| CC                  | 59 (0.52)                  | 61 (0.51)                                   | –        | 1.00 (Reference)    |
| CT + TT             | 55 (0.48)                  | 58 (0.49)                                   | 0.940    | 1.02 (0.61 to 1.71) |
| Alleles             |                            |                                             |          |                     |
| C                   | 165 (0.72)                 | 173 (0.73)                                  | -        | 1.00 (Reference)    |
| T                   | 63 (0.28)                  | 65 (0.27)                                   | 0.938    | 0.98 (0.66 to 1.48) |

**OR**, odds ratio; **95% CI**, 95% confidence interval. Data are expressed as n (frequency).

\*: statistically significant

Supplementary Figure S1: IIEF versus genotypes of *NOS1* polymorphisms - Clinical ED group.

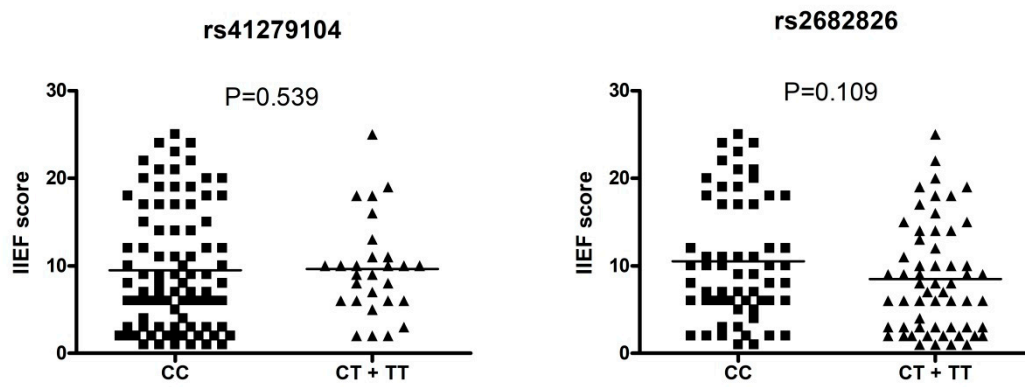

Values of the erectile function score expressed as mean  $\pm$  standard deviation. Student's t test.

Supplementary Table S2: Multivariate linear regression analysis showing the association of genotypes of *NOS1* with nitrite levels on Control and Clinical ED groups.

|                                      | Control              |          | Clinical ED          |          |
|--------------------------------------|----------------------|----------|----------------------|----------|
|                                      | R <sup>2</sup> =0.05 | RMSE=127 | R <sup>2</sup> =0.06 | RMSE=183 |
| Source                               | B                    | P        | B                    | P        |
| Age (years)                          | +0.01                | 0.988    | +1.27                | 0.516    |
| Diabetes<br>(yes)                    | -21.3                | 0.209    | -20.5                | 0.302    |
| <i>Smoking<br/>Status</i>            |                      |          |                      |          |
| Never                                | +9.54                | 0.298    | -41.2                | 0.167    |
| Smoker                               |                      |          |                      |          |
| Ex Smoker                            | -5.39                | 0.623    | +27.1                | 0.326    |
| Current<br>Smoker                    | -4.15                | 0.728    | +14.3                | 0.696    |
| Ethanol<br>Consumption<br>(>30g/day) | +6.42                | 0.568    | -16.6                | 0.711    |
| <i>Genotypes</i>                     |                      |          |                      |          |
| rs41279104                           | B                    | P        | B                    | P        |
| CC                                   | +8.57                | 0.307    | +11.1                | 0.631    |
| CT + TT                              | -8.57                | 0.307    | -11.1                | 0.631    |
| rs2682826                            | B                    | P        | B                    | P        |
| CC                                   | -7.53                | 0.253    | +4.83                | 0.805    |
| CT + TT                              | +7.53                | 0.253    | -4.83                | 0.805    |

**ED:** erectile dysfunction. **R<sup>2</sup>:** portion of variability explained by the model.

**RMSE:** root mean square error. All continuous variables were log-normalized.

TT haplotype was not observed in Control Group.

\* Statistically significant.

Supplementary Table S3: Haplotypes distribution of *NOS1* polymorphisms and association with Erectile Dysfunction.

| Haplotype        | Control<br>(n=228) | Erectile<br>Dysfunction<br>(n=238) | P     | OR (95% CI)         |
|------------------|--------------------|------------------------------------|-------|---------------------|
| CC               | 141                | 145                                | –     | 1.00 (Reference)    |
| CT               | 63                 | 61                                 | 0.780 | 0.94 (0.62 to 1.44) |
| TC               | 24                 | 28                                 | 0.676 | 1.13 (0.63 to 2.05) |
| TT               | 0                  | 4                                  | 0.050 | 8.75 (0.47 to 164)  |
| Global P = 0.242 |                    |                                    |       |                     |

**OR**, odds ratio; **95% CI**, 95% confidence interval. Data are expressed as n (frequency).

\*: statistically significant

Supplementary Figure S2: IIEF versus haplotypes of *NOS1* polymorphisms - Clinical ED group.

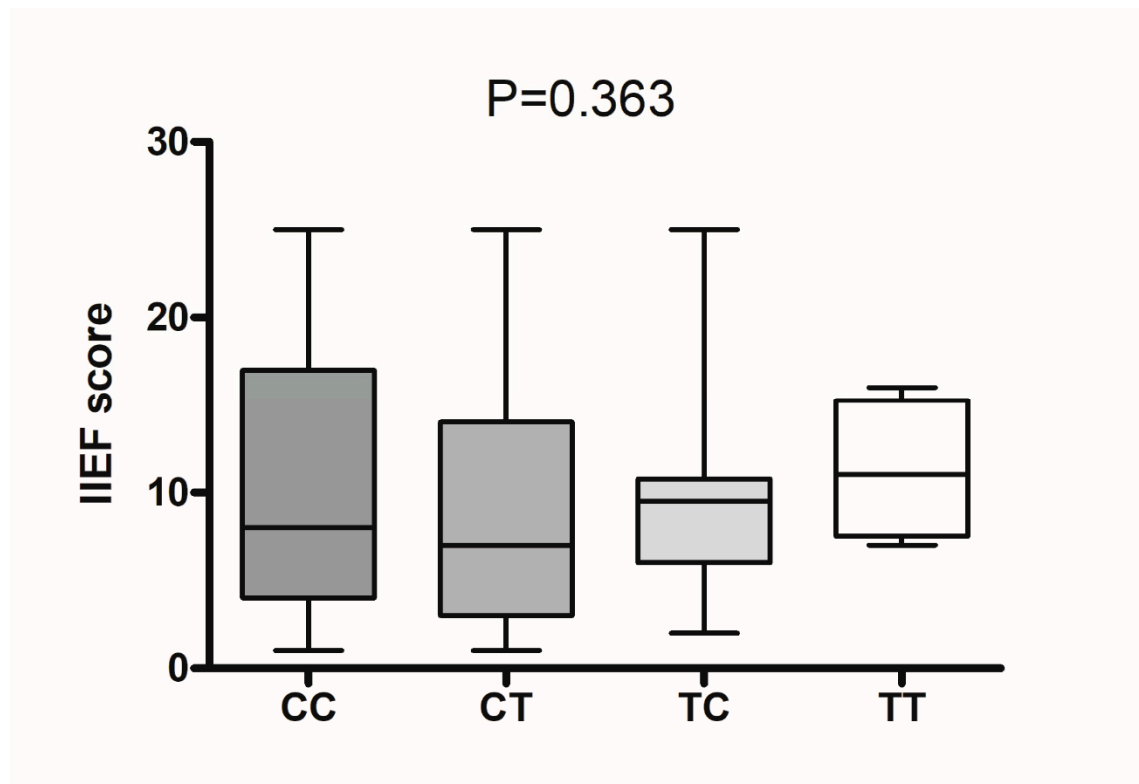

Values of the erectile function score expressed as median  $\pm$  interquartile ranges. Kruskal-Wallis test with Dunn's post-test.

Supplementary Table S4: Multivariate linear regression analysis showing the association of haplotypes of *NOS1* with IIEF scores on Control and Clinical ED groups.

|                                      | Control              |           | Clinical ED          |           |
|--------------------------------------|----------------------|-----------|----------------------|-----------|
|                                      | R <sup>2</sup> =0.09 | RMSE=0.03 | R <sup>2</sup> =0.12 | RMSE=0.36 |
| Source                               | B                    | P         | B                    | P         |
| Age (years)                          | -0.10                | <0.001*   | -1.21                | <0.001*   |
| Diabetes<br>(yes)                    | +0.00                | 0.385     | -0.01                | 0.787     |
| <i>Smoking<br/>Status</i>            |                      |           |                      |           |
| Never                                | +0.00                | 0.805     | +0.00                | 0.942     |
| Smoker                               |                      |           |                      |           |
| Ex Smoker                            | +0.00                | 0.264     | +0.09                | 0.010*    |
| Current<br>Smoker                    | -0.01                | 0.223     | -0.09                | 0.050     |
| Ethanol<br>Consumption<br>(>30g/day) | -0.00                | 0.413     | +0.04                | 0.545     |
| Haplotypes                           | P=0.212              |           | P=0.351              |           |
|                                      | B                    | P         | B                    | P         |
| CC                                   | -0.00                | 0.446     | +0.01                | 0.801     |
| CT                                   | +0.01                | 0.110     | -0.07                | 0.188     |
| TC                                   | -0.00                | 0.483     | +0.10                | 0.173     |
| TT                                   | -                    | -         | -0.04                | 0.598     |

**ED:** erectile dysfunction. **R<sup>2</sup>:** portion of variability explained by the model.

**RMSE:** root mean square error. All continuous variables were log-normalized.

TT haplotype was not observed in Control Group.

\* Statistically significant.

Supplementary Figure S3: Nitrite plasma concentration versus haplotype of NOS1 polymorphisms - Clinical ED group.

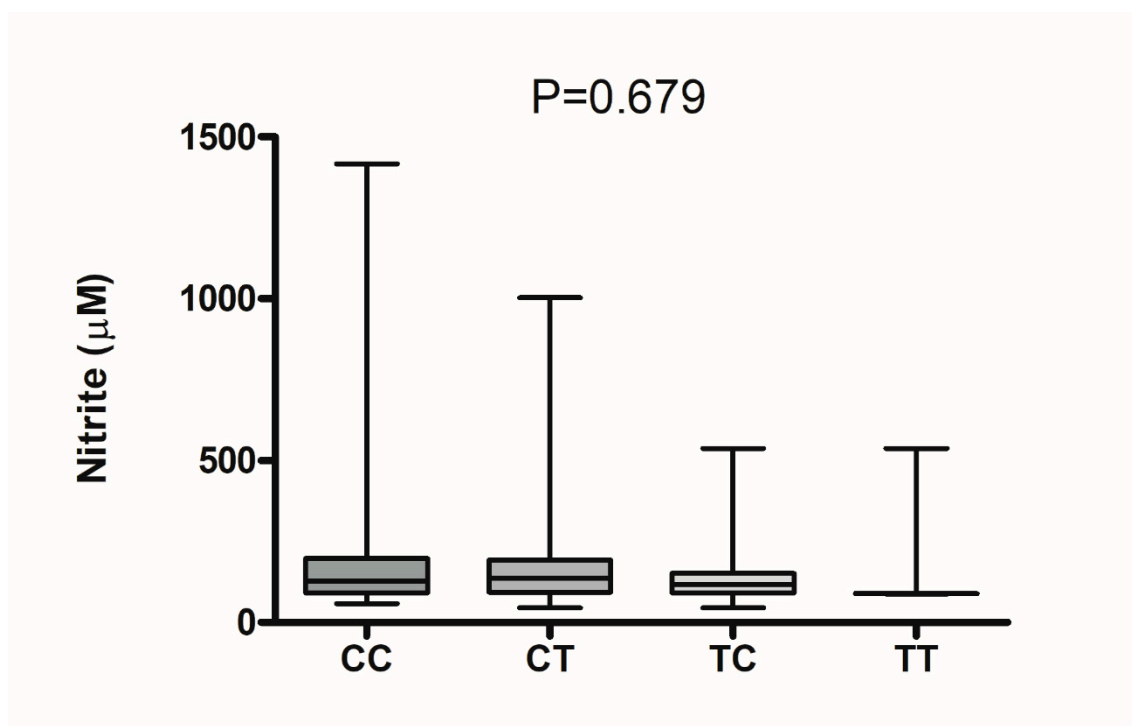

Values of the nitrite concentration expressed as median  $\pm$  interquartile ranges. Kruskal-Wallis test with Dunn's post-test.

Supplementary Table S5: Multivariate linear regression analysis showing the association of haplotypes of *NOS1* with nitrite levels on Control and Clinical ED groups.

|                                | Control              |          | Clinical ED          |          |
|--------------------------------|----------------------|----------|----------------------|----------|
|                                | R <sup>2</sup> =0.04 | RMSE=127 | R <sup>2</sup> =0.06 | RMSE=177 |
| Source                         | B                    | P        | B                    | P        |
| Age (years)                    | -0.02                | 0.966    | +1.29                | 0.321    |
| Diabetes (yes)                 | -20.0                | 0.088    | -21.3                | 0.111    |
| <i>Smoking Status</i>          |                      |          |                      |          |
| Never                          | +9.19                | 0.149    | -42.4                | 0.035*   |
| Smoker                         |                      |          |                      |          |
| Ex Smoker                      | -6.60                | 0.384    | +26.7                | 0.153    |
| Current Smoker                 | -2.59                | 0.753    | +15.6                | 0.531    |
| Ethanol Consumption (>30g/day) | +5.76                | 0.462    | -15.3                | 0.617    |
| Haplotypes                     | P=0.176              |          | P=0.823              |          |
|                                | B                    | P        | B                    | P        |
| CC                             | +0.27                | 0.967    | +5.33                | 0.862    |
| CT                             | +14.1                | 0.063    | -19.4                | 0.574    |
| TC                             | -14.4                | 0.149    | -16.1                | 0.683    |
| TT                             | -                    | -        | +30.2                | 0.701    |

**ED:** erectile dysfunction. **R<sup>2</sup>:** portion of variability explained by the model.

**RMSE:** root mean square error. All continuous variables were log-normalized.

TT haplotype was not observed in Control Group.

\* Statistically significant.



Supplementary Table S6: Genotypes distribution of polymorphisms rs2389866, rs3733526 and rs13124532 of *PDE5A* and association with Erectile Dysfunction.

| Polymorphism | Control<br>(n=113 <sup>†</sup> ) | Erectile<br>Dysfunction<br>(n=115 <sup>†</sup> ) | P     | OR (95% CI)         |
|--------------|----------------------------------|--------------------------------------------------|-------|---------------------|
| rs2389866    |                                  |                                                  |       |                     |
| TT           | 73 (0.66)                        | 71 (0.62)                                        | –     | 1.00 (Reference)    |
| TC + CC      | 38 (0.34)                        | 44 (0.38)                                        | 0.529 | 1.19(0.69 to 2.05)  |
| Alleles      | 222                              | 230                                              |       |                     |
| T            | 176 (0.79)                       | 183 (0.80)                                       | –     | 1.00 (Reference)    |
| C            | 46 (0.21)                        | 47 (0.20)                                        | 0.940 | 0.98(0.62 to 1.55)  |
| rs3733526    |                                  |                                                  |       |                     |
| AA           | 79 (0.70)                        | 78 (0.68)                                        | –     | 1.00 (Reference)    |
| AG + GG      | 34 (0.30)                        | 36 (0.32)                                        | 0.808 | 1.07 (0.61 to 1.88) |
| Alleles      | 226                              | 228                                              |       |                     |
| A            | 185 (0.82)                       | 188 (0.82)                                       | -     | 1.00 (Reference)    |
| G            | 41 (0.18)                        | 40 (0.18)                                        | 0.868 | 0.96 (0.59 to 1.55) |
| rs13124532   |                                  |                                                  |       |                     |
| CC           | 91 (0.81)                        | 96 (0.83)                                        | –     | 1.00 (Reference)    |
| CT + TT      | 22 (0.19)                        | 19 (0.17)                                        | 0.562 | 0.82 (0.42 to 1.61) |
| Alleles      |                                  |                                                  |       |                     |
| C            | 201 (0.89)                       | 209 (0.91)                                       | –     | 1.00 (Reference)    |
| T            | 25 (0.11)                        | 21 (0.09)                                        | 0.494 | 0.81 (0.44 to 1.49) |

**OR**, odds ratio; **95% CI**, 95% confidence interval. Data are expressed as n (frequency).

\*: statistically significant; <sup>†</sup> Numbers may vary due to incomplete call rate in genotyping of *PDE5A*.

Supplementary Figure S4: IIEF score versus genotypes of *PDE5A* polymorphisms - Clinical ED group.

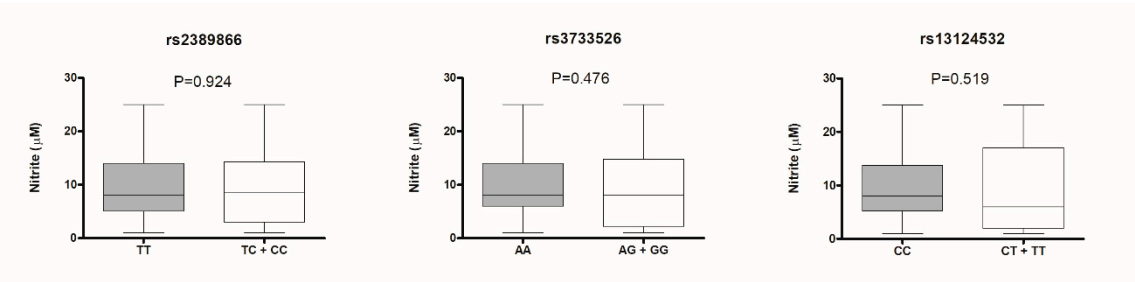

Values of the IIEF scores expressed as median  $\pm$  interquartile ranges. Mann Whitney test.

Supplementary Table S7: Multivariate linear regression analysis showing the association of genotypes of *PDE5A* with nitrite levels on Control and Clinical ED groups.

|                                      | Control              |           | Clinical ED          |            |
|--------------------------------------|----------------------|-----------|----------------------|------------|
|                                      | R <sup>2</sup> =0.06 | RMSE=70.5 | R <sup>2</sup> =0.11 | RMSE=165.7 |
| Source                               | B                    | P         | B                    | P          |
| Age (years)                          | -0.34                | 0.696     | +1.58                | 0.288      |
| Diabetes<br>(yes)                    | -18.06               | 0.349     | -14.74               | 0.361      |
| <i>Smoking<br/>Status</i>            |                      |           |                      |            |
| Never                                | +10.29               | 0.338     | -31.58               | 0.189      |
| Smoker                               |                      |           |                      |            |
| Ex Smoker                            | +1.49                | 0.910     | +39.65               | 0.095      |
| Current<br>Smoker                    | -11.78               | 0.430     | -8.07                | 0.791      |
| Ethanol<br>Consumption<br>(>30g/day) | +7.65                | 0.559     | +53.68               | 0.049      |
| <i>Genotypes</i>                     |                      |           |                      |            |
| rs2389866                            | B                    | P         | B                    | P          |
| TT                                   | -14.71               | 0.185     | +21.68               | 0.310      |
| CT + CC                              | +14.71               | 0.185     | -21.68               | 0.310      |
| rs3733526                            | B                    | P         | B                    | P          |
| GG                                   | -21.06               | 0.210     | -11.51               | 0.776      |
| AG + AA                              | +21.06               | 0.210     | +11.51               | 0.776      |
| rs13124532                           |                      |           |                      |            |
| CC                                   | +7.69                | 0.582     | +14.80               | 0.571      |
| CT + TT                              | -7.69                | 0.582     | -14.80               | 0.571      |

**ED:** erectile dysfunction. **R<sup>2</sup>:** portion of variability explained by the model.

**RMSE:** root mean square error. All continuous variables were log-normalized.

\* Statistically significant.

Supplementary Table S8: Haplotypes distribution of polymorphisms rs2389866, rs3733526 and rs13124532 of *PDE5A* and association with Erectile Dysfunction.

| Haplotype | Control<br>(n=226) | Erectile<br>Dysfunction<br>(n=230) | P     | OR (95% CI)         |
|-----------|--------------------|------------------------------------|-------|---------------------|
| TAC       | 175                | 179                                | –     | 1.00 (Reference)    |
| TAT       | 1                  | 0                                  | 0.313 | 0.33 (0.01 to 8.06) |
| TGC       | 4                  | 4                                  | 0.978 | 0.98 (0.24 to 3.97) |
| CAC       | 9                  | 11                                 | 0.670 | 1.20 (0.48 to 2.96) |
| CGC       | 13                 | 15                                 | 0.759 | 1.13 (0.52 to 2.44) |
| CGT       | 24                 | 21                                 | 0.622 | 0.86 (0.46 to 1.59) |

Global P = 0.907

**OR**, odds ratio; **95% CI**, 95% confidence interval. Data are expressed as n (frequency).

\*: statistically significant

Supplementary Figure S5: IIEF versus haplotypes *PDE5A* polymorphisms - Clinical ED group.

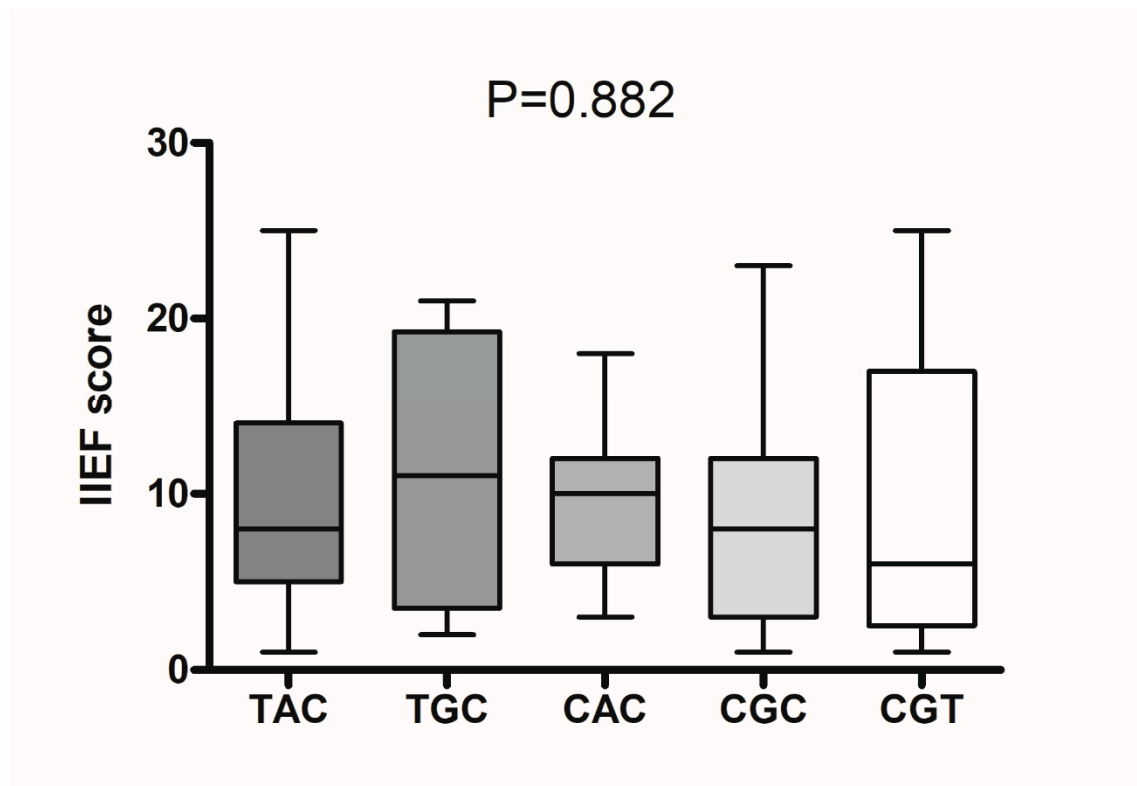

Values of the erectile function score expressed as median  $\pm$  interquartile ranges. Kruskal-Wallis test with Dunn's post-test.

Supplementary Table S9: Multivariate linear regression analysis showing the association of haplotypes of *PDE5A* with IIEF scores on Control and Clinical ED groups.

|                                | Control              |           | Clinical ED          |           |
|--------------------------------|----------------------|-----------|----------------------|-----------|
|                                | R <sup>2</sup> =0.09 | RMSE=1.81 | R <sup>2</sup> =0.20 | RMSE=6.05 |
| Source                         | B                    | P         | B                    | P         |
| Age (years)                    | -0.05                | <0.001    | -0.26                | <0.001    |
| Diabetes (yes)                 | +0.01                | 0.960     | -0.32                | 0.494     |
| <i>Smoking Status</i>          |                      |           |                      |           |
| Never                          | +0.24                | 0.200     | -0.25                | 0.717     |
| Smoker                         |                      |           |                      |           |
| Ex Smoker                      | +0.02                | 0.920     | +2.30                | <0.001    |
| Current Smoker                 | -0.27                | 0.278     | -2.05                | 0.017     |
| Ethanol Consumption (>30g/day) | -0.01                | 0.924     | -0.79                | 0.194     |
| Haplotypes                     | P=0.924              |           | P=0.773              |           |
|                                | B                    | P         | B                    | P         |
| TAC                            | +0.08                | 0.791     | -1.02                | 0.316     |
| CGT                            | -0.10                | 0.811     | -0.55                | 0.711     |
| CGC                            | +0.34                | 0.502     | +0.08                | 0.958     |
| CAC                            | -0.49                | 0.477     | -1.54                | 0.406     |
| TGC                            | +0.17                | 0.818     | +3.04                | 0.293     |

**ED:** erectile dysfunction. **R<sup>2</sup>:** portion of variability explained by the model.

**RMSE:** root mean square error. All continuous variables were log-normalized.

\* Statistically significant.

Supplementary Figure S6: Nitrite plasma concentration versus haplotype of *PDE5A* - Clinical ED group.

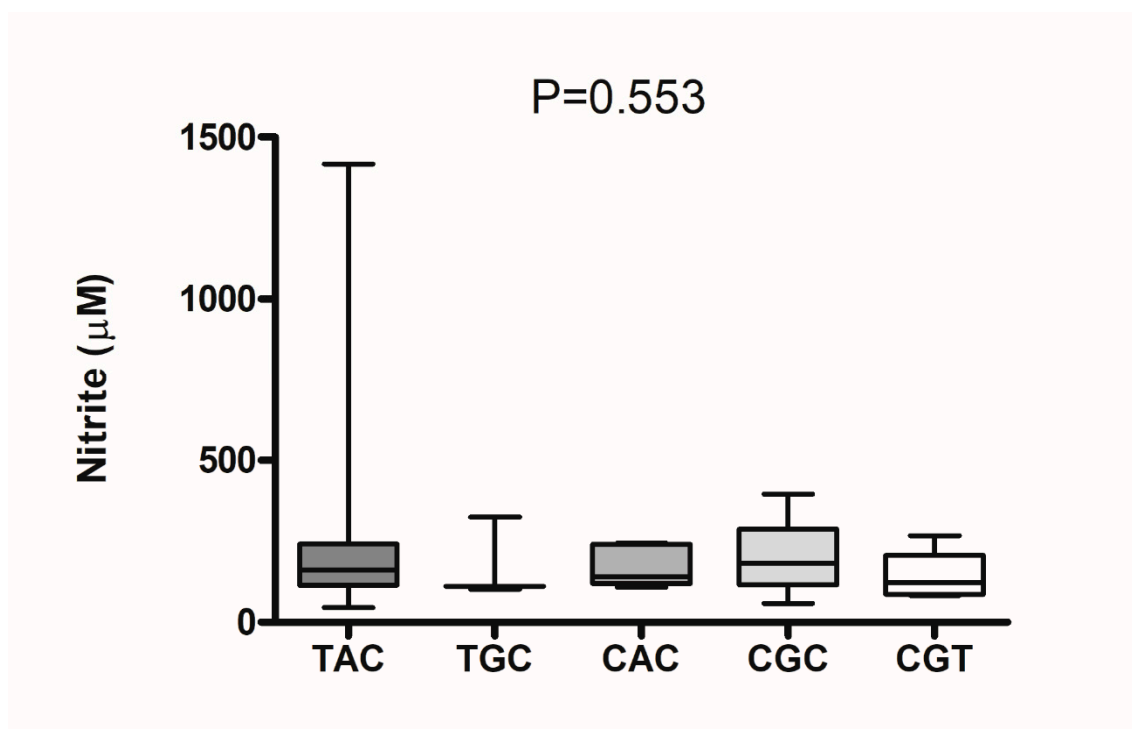

Values of the nitrite concentration expressed as median  $\pm$  interquartile ranges. Kruskal-Wallis test with Dunn's post-test.

Supplementary Table S10: Multivariate linear regression analysis showing the association of haplotypes of *PDE5A* with nitrite levels on Control and Clinical ED groups.

|                                      | Control              |            | Clinical ED          |             |
|--------------------------------------|----------------------|------------|----------------------|-------------|
|                                      | R <sup>2</sup> =0.03 | RMSE=69.34 | R <sup>2</sup> =0.08 | RMSE=178.86 |
| Source                               | B                    | P          | B                    | P           |
| Age (years)                          | -0.29                | 0.624      | +2.01                | 0.121       |
| Diabetes<br>(yes)                    | -24.19               | 0.086      | -17.83               | 0.200       |
| <i>Smoking<br/>Status</i>            |                      |            |                      |             |
| Never                                | +5.04                | 0.498      | -37.90               | 0.067       |
| Smoker                               |                      |            |                      |             |
| Ex Smoker                            | -1.28                | 0.880      | +29.23               | 0.128       |
| Current<br>Smoker                    | -3.75                | 0.695      | +8.67                | 0.731       |
| Ethanol<br>Consumption<br>(>30g/day) | +7.33                | 0.313      | +30.50               | 0.092       |
| Haplotypes                           | P=0.822              |            | P=0.774              |             |
|                                      | B                    | P          | B                    | P           |
| TAC                                  | +4.66                | 0.694      | +26.76               | 0.375       |
| CGT                                  | -6.75                | 0.688      | -29.46               | 0.509       |
| CGC                                  | +15.76               | 0.422      | -4.73                | 0.921       |
| CAC                                  | +11.50               | 0.666      | -2.62                | 0.961       |
| TGC                                  | -25.18               | 0.388      | +10.06               | 0.906       |

**ED:** erectile dysfunction. **R<sup>2</sup>:** portion of variability explained by the model.

**RMSE:** root mean square error. All continuous variables were log-normalized.

\* Statistically significant.
